# Supplementary material for: Inter-Fighting between Influenza A Virus NS1 and β-TrCP: A Novel Mechanism of Anti-Influenza Virus
Source: MDPI journal article supplement (doi:10.3390/v14112426), 2022-10-31

**Figure S1.** Host protein  $\beta$ -TrCP associates with Influenza A virus NS1 protein

293T cells were transfected with Flag- $\beta$ -TrCP and HA-NS1(PR8) for 48 hours and then immunoprecipitated with anti-Flag (A) and anti HA (B), then immunoblotted with anti-Flag and anti-HA antibodies. 293T cells were transfected Flag- $\beta$ -TrCP with HA-NS1 of PR8 and maCa04, the cell lysates were immunoprecipitated with anti-HA and immunoblotted with anti-Flag and anti-HA (C).

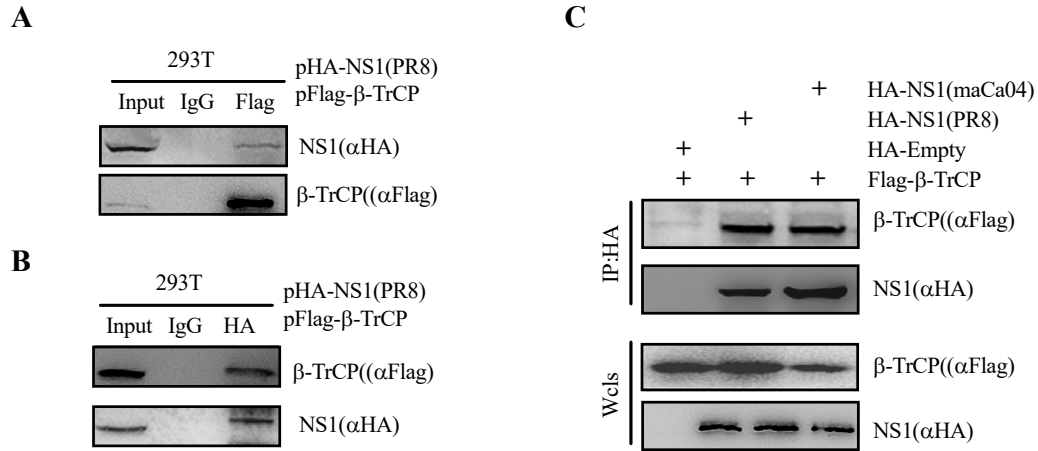

**Figure S2.**  $\beta$ -TrCP affects Influenza A virus replication. The effect of  $\beta$ -TrCP knock-down or overexpress on PR8 replication in 293T and A549 cells. Briefly, cells were transfected with  $\beta$ -TrCP small interfering RNA (si $\beta$ -TrCP) or pFlag- $\beta$ -TrCP eukaryotic plasmid for 48 hours and then followed by PR8 virus infection with a dose of 1 m.o.i for 12 hours, and the cellular lysates were harvested and immunoblotted with PB2, PA, HA, NS1 and  $\beta$ -TrCP (A and C) or and Flag (B and D) antibodies, and  $\beta$ -actin as a loading control.

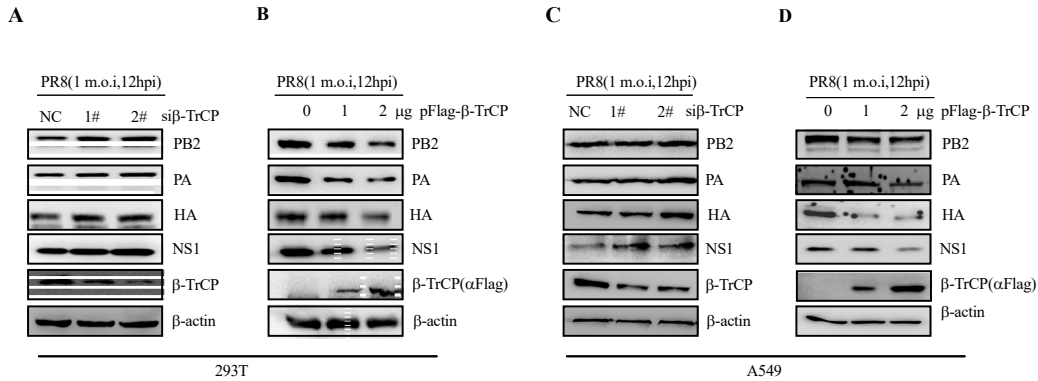

**Figure S3.** NS1 interaction with cellular  $\beta$ -TrCP. 293T cells were infected with PR8 virus at 1 m.o.i for 12 hours, then the cell lysates were harvested and immunoprecipitated with anti- $\beta$ -TrCP and immunoblotted with anti- $\beta$ -TrCP and NS1.

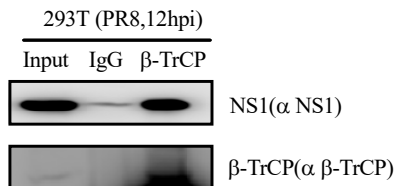

Supplement: s1 [file s1]
